# Supplementary material for: Predictors of relapse after withdrawing biotherapies in children with inactive juvenile idiopathic arthritis: a retrospective cohort study of the JIR cohort
Source: Research Square preprint supplement (doi:10.21203/rs.3.rs-7334358/v1), 2025-09-11
Supplement: Supplementary file 1 [file 1baa03300b98d4eeae77e7cb.docx]

Table 1: Baseline characteristics of patients with first b/ts-DMARD withdrawal (n=115)
