# Supplementary material for: Predictors of relapse after withdrawing biotherapies in children with inactive juvenile idiopathic arthritis: a retrospective cohort study of the JIR cohort
Source: Research Square preprint supplement (doi:10.21203/rs.3.rs-7334358/v1), 2025-09-11
Supplement: Supplementary file 2 [file c80848e0c620790f85c0d4e7.docx]

Table 2: Factors associated with relapse among non-systemic JIA (n=109); univariable analysis
